# Supplementary material for: Low salinity as a biosecurity tool for minimizing biofouling in ships sea-chests
Source: Copernicus journal article supplement (doi:10.5194/os-2018-35), 2018-03-22
Supplement: Supplementary file [file os-2018-35-AC2-supplement.pdf]

Authors' answer to Referee 2 comments:

Thank you very much for your comments and suggestions which certainly improve substantially our manuscript. All of them are addressed directly in the text of the manuscript (in red) as follows:

## 1 Introduction

Biofouling is a major vector in the transfer of non-native species around the world (Carlton et al., 1995; Ruiz et al., 1997; Gollasch, 2002; Coutts & Taylor, 2004; Castro et al., 2017). Species can be transported on virtually all submerged areas of ships so anti-fouling systems are used. However, some areas on ships hulls, such as sea chests and chain lockers, are difficult to access and coat with anti-foulants. Consequently, these areas often get heavily fouled by a wide variety of marine organisms such as hydroids, serpulid polychaetes, barnacles, mussels, bryozoans and tunicates (Coutts & Taylor, 2004; Murray et al., 2011).

Non-native species introduction and spread is increasing, e.g. due to the opening of new trade routes, climate change and the increasing speed of vessels. The International Maritime Organization (IMO) decided to tackle this problem initially by adopting a set of voluntary regulations. In 2011, the IMO Marine Environment Protection Committee issued Resolution MEPC.207(62) outlining measures to minimize the risk associated with ship biofouling. These regulations are directed at many stakeholders (e.g. States, shipmasters, operators and owners, shipbuilders, port authorities, ship repair, dry-docking and recycling facilities, anti-fouling paint manufacturers / suppliers). Two subsequent sets of guidance on biofouling have since been released: one for recreational craft less than 24 meters in length (MEPC.1/Circ.792, 2012), and the second evaluating the 2011 Guidelines for the control and management of ship biofouling to minimize the transfer of invasive aquatic species (MEPC.1/Circ.811, 2013) (Castro, 2014).

Following the entry into force of the Ballast Water Convention in 2017, it seems probable that ship biofouling may soon become the subject of a new international treaty. In May, 2017, a programme called "Building Partnerships to Assist Developing Countries to Minimize the Impacts from Aquatic Biofouling" (or "GloFouling Partnerships") was approved by the Global Environment Facility to be implemented by the United Nations Development Programme and executed by the IMO. An implementation phase will start in the second half of 2018 and last five years (IMO Circular Letter No 3768). In some countries, biofouling management plans and record books are already in place as part of national regulations (e.g. in the United States of America, Australia and New Zealand). For instance, in the State of California (USA), ship owner/operators of vessels of 300 gross tons or larger need to answer eleven questions about hull husbandry every year (Scianni et al., 2013).

Biofouling increases shipping operational costs; even microbial fouling, which is a pre-cursor to macro-fouling, increases fuel consumption due to frictional drag. There are also the costs of hull cleaning and painting (Schultz et al., 2011; Dobretsov et al., 2013; Davidson et al., 2016). Some organisms (e.g. bryozoans and algae) are tolerant to antifouling compounds and can grow on freshly applied antifouling paint, and are subsequently used as a substratum for other species (Murray et al., 2011). With the ban of tributyltin in 2008, other anti-fouling systems started to be used, being copper-based ones the most commonly used nowadays. Apart from copper, booster biocides are also used in antifouling system despite their potential impacts on the marine ecosystems (Fajó et al, 2010; Price and Readman, 2013), for instance, glycerophospholipids from soybeans are considered effective booster biocides in antifouling paint (Batista et al, 2015). Antifouling compounds from marine bacteria, cyanobacteria, fungi as well as

eukaryotic organisms have also been developed as biocides (Dobretsov et al., 2013). In terms of mechanical tools to remove biofouling, Hearin et al. (2016) showed that mechanical grooming is helpful in reducing fouling on submerged surfaces coated with fouling-release coatings.

Niche areas on vessel hulls (e.g. gratings and propellers) represent a great challenge to minimising biofouling. On larger vessels, sea chests maximize seawater inflow (e.g. for internal cooling systems and ballast water). These box-shaped structures are difficult to access and coat, they have edges and welds that provide sheltered areas for organisms to settle and recruit (Coutts & Dodgshun 2007). In Canada, a study of 82 sea-chests from commercial ships showed that 80% of them had fouling organisms and that almost half had non-native species (Frey et al., 2014).

Setting biosecurity goals and implementing measures for controlling non-indigenous species helps to avoid their spread (Collin et al., 2015). In order to control biofouling in niche areas on ships, a simple efficient treatment method is needed. Numerous methods are available, for example ultraviolet light (Titus & Ryskiewich, 1994), heated water and steam, (Leach, 2011; Piola & Hopkins, 2012; Growcott *et al.*, 2016) or soaking areas in acids (e.g. acetic acid) or alkalines, such as hydrated lime (Rolheiser *et al.* (2012). In Alaska, the invasive colonial ascidian *Didemnum vexillum* was exposed to various treatments using acetic acid, bleach, freshwater or brine with 100% mortality when exposed to freshwater for four hours (McCann *et al.*, 2013). In Brazil, Moreira *et al.* (2014) tested the use of freshwater to combat the spread of invasive corals *Tubastraea tagusensis* and *T. coccinea*. For both these species, two hour exposure to fresh water killed all the corals and this treatment is now routinely used for combat the spread of *Tubastraea* spp. on oil industry infrastructure. In New Zealand, Jute and Dunphy (2016) showed that two hour exposure to fresh water killed the invasive Mediterranean fan worm *Sabella spallanzanii*, while in hypersaline conditions (50 psu) 100% mortality was reached after 24 hours. Finally two studies conducted in Plymouth, UK, showed that low saline treatments can be highly effective at reducing biofouling and can be used in conjunction with anti-fouling coating systems (Minto, 2014; Quinton, 2014). Although chemical treatments, the use of heat, or the use of UV light all work they can be costly, or pose health and safety risks and also increase corrosion of hulls. On the other hand, freshwater is not dangerous, and it is cheap and widely available.

Given the importance of biofouling as a vector in the world transfer and spread of non-native species, this study tested the hypothesis **that a rapid change in the salinity can kill fouling species taking into account the regulation of the osmotic pressure between the surrounded aquatic environment and the organisms body fluids** and offers a simple and efficient biosecurity management tool to minimize biofouling in ship sea-chests. **This case of study was conducted in southwestern England and is representative of the fouling community of the northeastern Atlantic Ocean.**

## **2 Methods**

### **2.1 Study area**

An experiment was conducted in two phases, the first in November 2016 and the second in July/August 2017 in Millbay Marina (50°21'47''N; 004°09'02''W), Plymouth, UK. The marina is tidal and open to Plymouth Sound, a

large bay on the south coast of Devon (SW England) that is sheltered by an artificial breakwater (Bremekamp, 2012).

## 2.2 Research design

A model sea-chest was built to find out the lowest steady salinity that could be achieved when the chest was flushed with freshwater whilst submerged and open to surrounding seawater. The sea-chest was a polypropylene 80 l container (external dimensions: 600 x 400 x 420 mm); 12 panels were fixed inside with stainless threaded rods to simulate gratings. A YSI 556 Multiparameter meter, complete with conductivity probe, was hooked inside the box to measure salinity. The box was deployed so that the panels were vertical and about 1.5 m from the seawater surface; measurements of temperature and salinity started immediately after the deployment and were recorded every 10 seconds. To create a hyposaline environment inside our immersed sea-chest, freshwater was flushed into the box through a hose connected to a tap on the pontoon. A flow rate of approximately 8 l/min was kept during the experiment bearing in mind the necessity of preventing excess turbulence inside the box. Flow was suspended after 86 minutes when the salinity stabilised and the probe stopped recording five hours later.

Polyvinyl chloride (PVC) settlement panels (each 12 x 12 x 0.5 cm) were deployed in the same marina > two years before the experiment, in June, 2014. Initially they were fixed in grids horizontally orientated with the roughened side facing outwards, in a depth of approximately 1.5 m, avoiding sedimentation and algae growth (Quinton, 2014). Five months before the low salinity experiment, panels were rearranged in a vertical position tied to a rope and attached to the pontoon. At this stage, panels were less exposed to the light, almost under the pontoon which also helped to preclude macroalgae. Fifteen of these panels were selected based on the existence of a well-developed fouling community, including the native ascidian *Dendrodoa grossularia* on all panels and the non-native encrusting bryozoan *Watersipora subatra* on most of the panels. The objective was to examine the effects of low salinity water treatments on the whole community assemblage on each panel.

Panels were subjected to one of the following treatments: 7 psu, 20 psu and control (33 psu) for two hours (five panels per treatment). The lowest salinity (7 psu) was chosen as it was the lowest steady value achieved inside our simulated sea-chest. The exposure time was chosen based on the studies conducted by Moreira *et al.* (2014) and Jute & Dunphy (2016). On the day before the experiment started, water from the marina was collected and stored in a constant temperature room of around 16°C at Plymouth Marine Laboratory similar to the temperature found in the marina. The water used to prepare the different salinity treatments during the experiment was a mix of local sea water and pure fresh water (Milli-Q water), stored in the same room.

## 2.3 Analysis

An acrylic 12 x 12 cm quadrat divided into a 1 cm<sup>2</sup> square grid was used to enumerate organisms on the settlement panels. The apparatus (settlement panel & quadrat) were submerged in seawater in a Pyrex dish for analysis. At each intersection point on the grid, organisms were identified, where possible to species level. Each taxon was enumerated, with colonial invertebrates counted as one maximum per square. Analysis times were set to a maximum of 25 minutes in order to minimise stress to the organisms. Panels were evaluated regarding the abundance and

mortality of fouling organisms before the exposure to fresh water, immediately afterwards, and on two more occasions: one week and one month after. Mortality was assessed e.g. through detachment of the organisms from the panels, a lack of response (e.g. tunicates with no reaction when siphons were touched), absence of zooids in erect bryozoans, alterations in the texture / colour of the organisms.

Data from fouling communities were entered into PRIMER-E for abundance analysis and were square root transformed prior to clustering analysis according to Clarke et al., 2016. Dendrogram plots were used to determine similarity of fouling communities before, immediately after, one week and one month after the exposure to one of three salinities targeted by this experiment.

### 3 Results

The first phase of the experiment was to ascertain the lowest salinity that could be maintained inside our simulated sea-chest. The salinity was initially 32 psu, decreasing to 24 psu after 25 mins, to 9 psu after 60 mins before stabilizing at 7 PSU at 86 mins. Once the freshwater supply was switched off the salinity inside the sea-chest increased slowly over a 5 h 20 min period to 27.3 PSU, when the recordings ended. During this time the water temperature varied between 13 and 13.6°C.

Biofouling communities were similar on panels before and immediately after treatment but thereafter there were marked differences since low salinity treatments killed most of the organisms present. Cluster analysis of the biofouling community composition one week after the treatment (Fig. 1, and one month after, not shown) showed that panels submitted to the same treatment were clustered together, as they had similar communities present. Tight clustering was found for panels exposed to 7 psu; few mortality effects were found at 20 psu and no effects were found on control panels (33 psu).

Figure. 1. Dendrogram showing significant separation between biofouling communities grown on settlement panels treated with 7 psu and all the others treated with 20 psu and 33 psu (n=5 for each treatment).

On panels treated with 7 psu terebellid worms quickly disintegrated and the erect native bryozoan *Bugula neritina* leached a purple/brown colour into the water. The native ascidian *Ciona intestinalis* was less reactive when touched with forceps than before the exposure. Neither *Dendrodoa grossularia*, the most frequent organisms on all panels, nor *Watersipora subatra* colonies showed immediate visual responses to the treatments. After one week levels of mortality were much more noticeable: for example 142 *D. grossularia* were counted on the five panels submitted to 7 psu - after a week 52 of these disintegrated when touched and were clearly dead. Erect bryozoans fell apart when touched with forceps and all of the *Ciona intestinalis* had fallen off the panels. All of the native ascidian *Asciella mentula*, were killed by the 7 psu treatment and had lost colour with flaccid tests filled with a dark liquid of rotting tissue. Most organisms exposed to the 33 or 20 psu treatments survived (Fig. 2). More grid squares with bare panel or biofilm were counted on all panels treated with 7 PSU (Table 1). All *W. subatra* individuals were dead after a week with dark slime covering the panels and the distinct odour of rotting organisms.

Figure. 2. A) Settlement panel one week after exposure to a 33 psu treatment showing the high biomass and diverse biofouling community that had developed over two years at 1.5 m depth in a marina off Plymouth, UK. B) Example

of a panel one week after exposure to a 20 psu treatment with many members of the biofouling community still alive. C) Panel one week after a 7 psu treatment showing black sulphurous rotting tissues. D) Typical panel appearance one month after exposure to 7 psu showing a much reduced fouling community.

In the 20 psu exposures *C. intestinalis* were less responsive immediately after treatment. After one week, 50% of *W. subatra* colonies were dead, of a total of 60 *D. grossularia* only two (3.3%) had died. Many *D. grossularia* individuals were covered with *Diplosoma listerianum*, not previously observed. This colonial tunicate is widespread in the United Kingdom and shows rapid reproduction and growth rates (Bullard *et al.*, 2004, 2007; Vance *et al.*, 2009).

One month after exposure to the three salinity treatments there were still very clear differences among the treatment groups although some recolonisation had begun on the 7 psu panels (Table 1). Numbers of species and Shannon-Wiener diversity index show a decrease in diversity after one week and a small increase after one month for panels exposed to 7 psu (Fig. 3).

Table 1: Average number of biofouling individuals per panel subjected to treatment with 7 psu, 20 psu and 33 psu (control) water, showing % change in abundance after one week and after one month.

Figure 3. A) Average number of species and B) Shannon-Wiener diversity index ( $H'$ ) of two year old biofouling communities developed on PVC panels at 1.5 m depth in a marina off Plymouth, UK. Panels exposed to 7, 20 and 33 psu (Control) before treatment (ST), immediately after exposure (AF), one week after (1W) and after one month of exposure (1M). Error bars are  $\pm$  SD, n=15.

#### 4 Discussion

We obtained a steady value of 7 psu inside our model sea-chest when immersed at Millbay marina while flushed with fresh water. This was the minimum salinity we used in an experiment to assess the mortality of fouling organisms attached to PVC panels when exposed to three different salinities (7, 20 and 33 psu (Control)). The 7 psu treatment was highly effective at killing most of the macrobenthos on the panels, whereas communities exposed to 20 and 33 psu were largely unaffected. There was some recolonization of bare substrata on the panels after one month, thus this treatment would be best carried out on sea chests before a vessel leaves port, if she is destined for another biogeographic region.

Freshwater exposure is an efficient way of controlling sublittoral marine fouling organisms as most suffer osmotic stress (Moreira *et al.*, 2014; Quinton, 2014; Minto, 2014; Jude & Dunphy, 2016). Most organisms were killed by our two hour treatment with 7 psu water. For example, although *D. grossularia* had only 38% of mortality all the non-native *W. subatra* were all killed after one week. After one week many dead rotting organisms were seen, which then fell off the panels leaving bare space and revealing an understorey of organisms that were previously obscured, such as *Pomatoceros* sp. (Table 1).

Of the two commonest species found in this study, *D. grossularia* and *C. intestinalis*, the first is a small, robust tunicate, while the second is large, soft and highly contractile tunicate. Their bauplan possibly contributed to their differing vulnerability to the treatment. After one month, new *Clavelina lepadiformis* had colonized along with

small erect bryozoans and *W. subatra* colonies (Table 1; Fig. 3). Thus flushing sea chests with seawater would be an effective treatment for removing biofouling but will be time-dependent, with new recruitment occurring within a month. For vessels which stay for long periods in berth we suggest low salinity flushing of sea chests is applied shortly before vessels depart for the next port of call.

## 5 Conclusion

Very high levels of mortality occurred in mature biofouling communities subjected to two hour treatment with 7 psu water, although some *Dendrodoa grossularia* were resilient. Low salinity treatments can be an efficient way of minimizing biofouling from ship sea-chests, and offer a promising tool to be incorporated in vessel operation. This would be an environmentally friendly biosecurity tool for minimizing and controlling ships sea-chest biofouling that is simple and would not cause undue delay or costs. **Limitations of this study are related to its representativeness of one single geographic area, to the fact that the composition of the fouling community can be highly diversified with some organisms being more adjustable to unfavourable conditions than others and yet to the static conditions faced by the organisms during their development in the marina which differ from a ship sea-chest en voyage.**
